# Supplementary material
Source: publisher figshare collection journal article supplement (https://acs.figshare.com/ndownloader/files/4116187)
Supplement: Supplementary file 1 [file 4116187]

a)

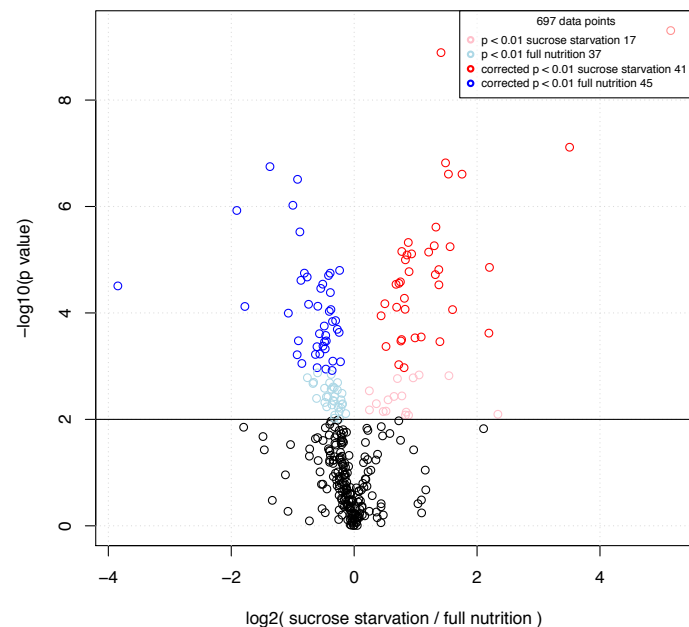

b)

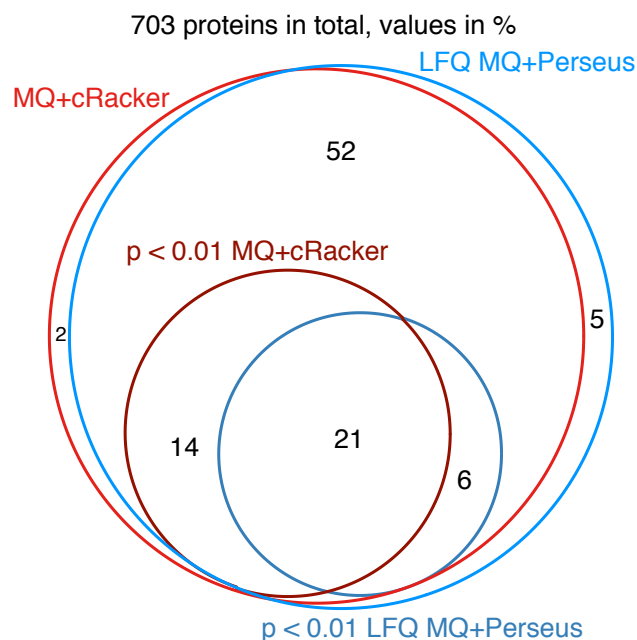

c)

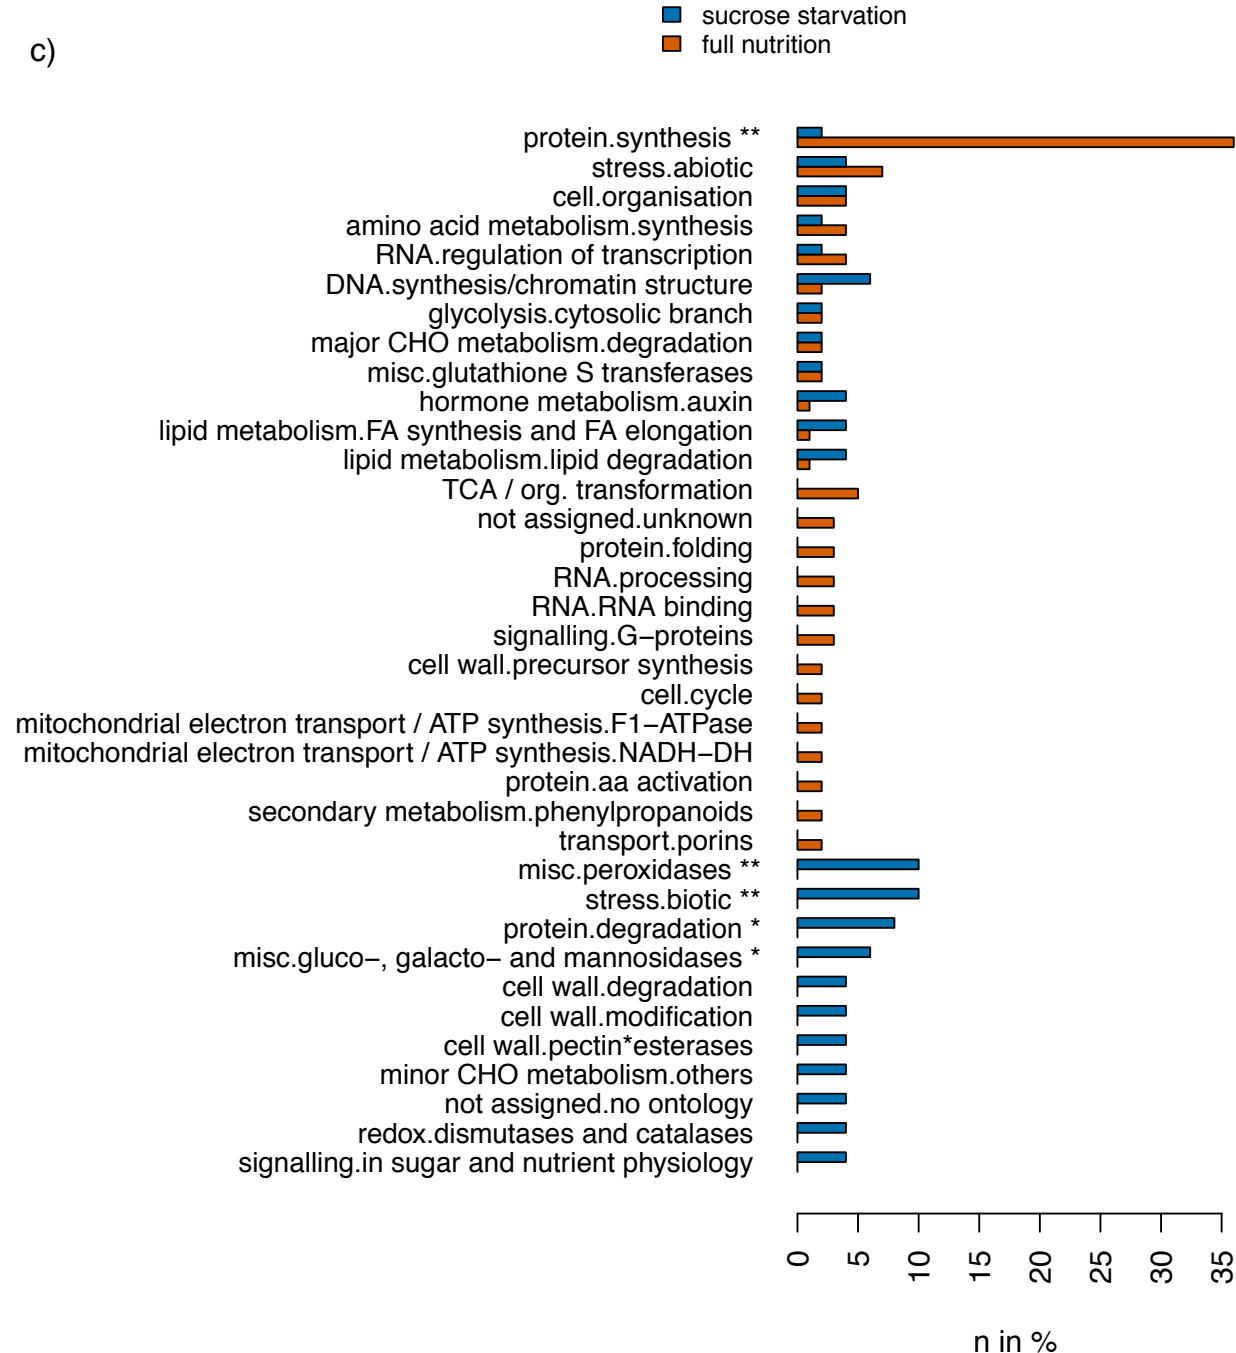

Supplementary figure 3: Data analysis of the full nutrition sucrose starvation experiment using LFQ (Label Free Quantitation) derived values from MaxQuant. **a)** Volcano plot from t-test analysis performed using Perseus software. **b)** Weighted Venn diagram comparing all analyzable proteins using Intensities from MaxQuant and cRacker or LFQ values from Maxquant and the significantly tested differentially abundant proteins using t-test analysis ( $\alpha = 0.01$ , Benjamini-Hochberg correction). MQ+Cracker - all analyzable proteins using MaxQuant intensities and cRacker; LFQ MQ+Perseus - all analyzable proteins, using LFQ values from MaxQuant and Perseus. **c)** Barplot of MapMan functional categories comparing differentially abundant proteins from LFQ value analysis. Fisher Exact test has been used for testing ( $\alpha = 0.05$ ). \*\* - corrected  $p < 0.01$ ; \* - uncorrected  $p < 0.01$ .
